# Supplementary material for: ABCA1 69C>T Polymorphism and the Risk of Type 2 Diabetes Mellitus: A Systematic Review and Updated Meta-Analysis
Source: PubMed Central journal article supplement (PMC8104122; doi:10.3389/fendo.2021.639524), 2021-04-23

**Supplementary figure 1.** Funnel plots showing the association between the *ABCA1* 69C>T genotype and T2DM risk. (A) CC or CT vs. TT, (B) CC vs. CT, (C) CC vs. TT, (D) CT vs. TT.

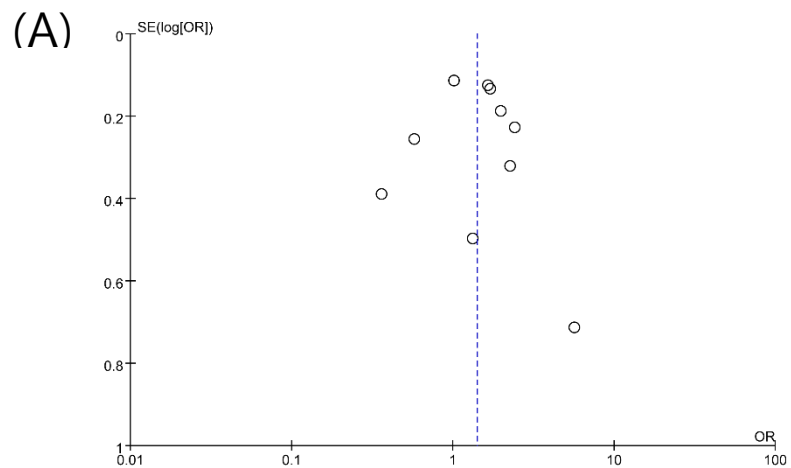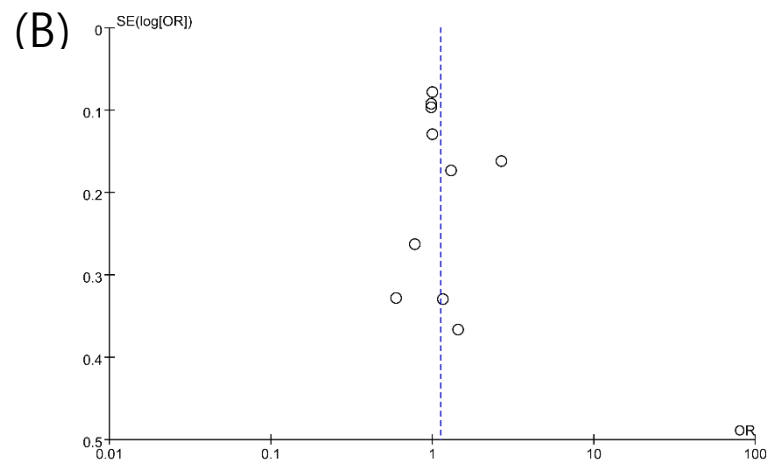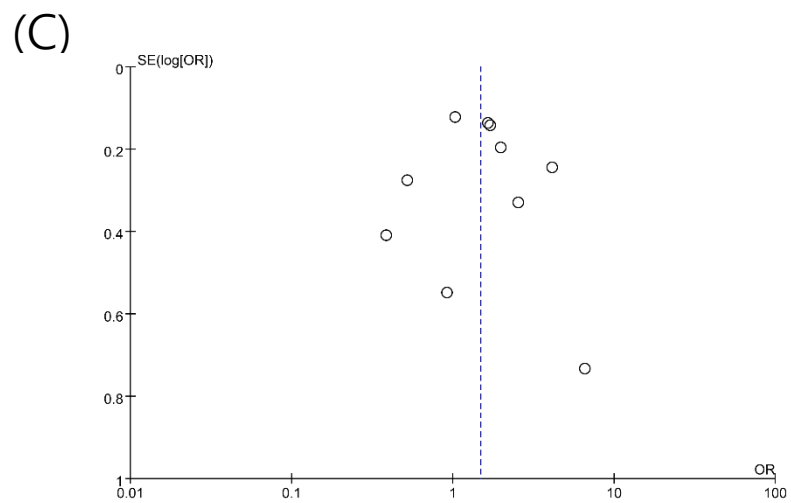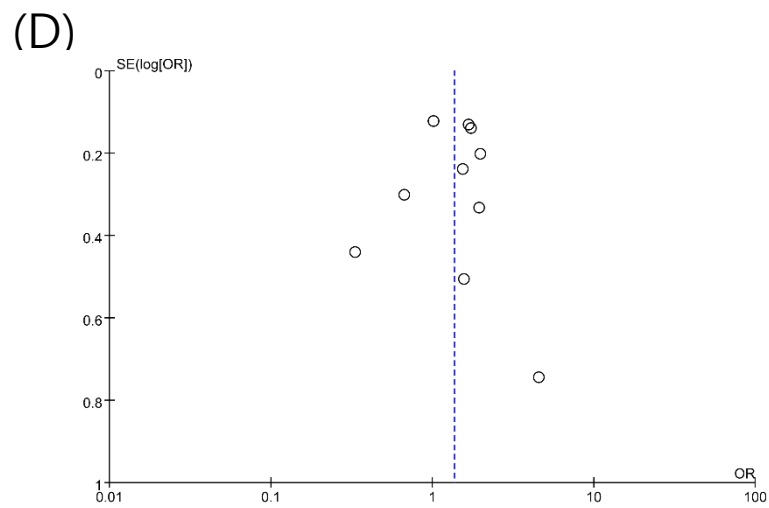

Supplement: DataSheet_1.pdf [file DataSheet_1.pdf]
